# Supplementary material for: Changes in hepatic fibrosis and vitamin D levels after viral hepatitis C eradication using direct-acting antiviral therapy
Source: PubMed Central journal article supplement (PMC7568415; doi:10.1186/s12876-020-01485-8), 2020-10-17
Supplement: 12876_2020_1485_MOESM2_ESM.pdf [file 12876_2020_1485_MOESM2_ESM.pdf]

**SUBMISSION PROPOSAL FOR  
INSTITUTIONAL REVIEW BOARD  
FACULTY OF MEDICINE, CHULALONGKORN UNIVERSITY  
BANGKOK, THAILAND**

| <b>Table of contents</b>             | <b>Page</b> |
|--------------------------------------|-------------|
| Front page                           | 2           |
| 1. Background                        | 3           |
| 2. Hypothesis and research questions | 5           |
| 3. Research design and methodology   | 6           |
| 4. References                        | 10          |
| 5. Appendix                          |             |
| 5.1 Case record form                 | 12          |
| 5.2 Patient information sheet        | 14          |
| 5.3 Informed consent sheet           | 20          |

**RESEARCH PROPOSAL SUBMITTED FOR  
INSTITUTIONAL REVIEW BOARD  
FACULTY OF MEDICINE, CHULALONGKORN UNIVERSITY  
BANGKOK, THAILAND**

**Title:** Comparison of transient elastography, acoustic radiation force impulse and magnetic resonance imaging for non-invasive staging of liver fibrosis in patients with chronic hepatitis C and nonalcoholic fatty liver disease: 1-year follow-up of fibrosis progression

**Principle investigators:**

1. Dr. Piyawat Komolmit

**Affiliation:**

Division of Gastroenterology and Hepatology  
Department of Medicine,  
Faculty of Medicine Chulalongkorn University

## 1. Background

Chronic hepatitis C and non-alcoholic liver disease (NAFLD) are the leading causes of chronic hepatitis worldwide. The persistent inflammation of liver parenchyma results in progressive fibrosis, which ultimately turns to liver cirrhosis. Liver biopsy is the gold standard method for fibrosis evaluation. However, it is not free of risk. Bleeding complication was reported with incidence of 1:2,500 to 1:10,000 and fatal complication was also reported about 0.09%. Nowadays, there are new devices and technology for evaluating liver fibrosis instead of invasive liver biopsy, which help us to detect an early stage of liver fibrosis.

Ultrasound elastography and magnetic resonance imaging were developed in recent years. Unfortunately, there was no data in Thai chronic hepatitis patients. Therefore, we conducted this study to evaluate the performance of ultrasound elastography and magnetic resonance imaging in Thai patients.

Chronic hepatitis C is the leading problems among world population. Recent study reports more than 185 million people suffering from hepatitis C virus (HCV) infection (1). Non-alcoholic fatty liver disease (NAFLD) is another concerning health issue, especially in the western countries. Incidence of NAFLD has been reported about 19-46% (2). Both hepatitis C and NAFLD are the major causes of chronic liver disease, hepatocellular carcinoma in Thailand.

### Definition of liver fibrosis and diagnosis

Hepatic fibrosis occurs after the event of liver injury. Hepatic stellate cells (HSCs) are activated and transformed to activated HSCs or myofibroblasts. This active form of HSCs control a fibrogenic cytokines eg. transforming growth factor (TGF- $\beta$ ), platelet derived growth factor (PDGF), connective tissue growth factor (CTGF) leading to accumulation of extracellular matrix and eventually turning to liver fibrosis (3,4). Nowadays, we believe that the regression of liver fibrosis can occur after the resolution of liver injury.

Classification of liver fibrosis can predict the severity and prognosis of liver diseases. Liver biopsy is a standard method for determining the definite fibrosis. Many purposed classifications are used in clinical practice such as METAVIR, Knodell, Schuer, Ishak score (5). Moreover, these classified data are correlated with clinical presentation and prognosis of chronic hepatitis patients.

**Table 1. Liver fibrosis classification**

| METAVIR score |                                                                                         |
|---------------|-----------------------------------------------------------------------------------------|
| Stage         |                                                                                         |
| 0             | No fibrosis                                                                             |
| 1             | Mild fibrosis-portal fibrosis                                                           |
| 2             | Moderate fibrosis-portal fibrosis and few septa                                         |
| 3             | Severe fibrosis-numerous septa without cirrhosis                                        |
| 4             | Cirrhosis                                                                               |
| ISHAK score   |                                                                                         |
| Stage         |                                                                                         |
| 0             | No fibrosis                                                                             |
| 1             | Fibrous expansion of <b>some</b> portal area ± short fibrous septa                      |
| 2             | Fibrous expansion of <b>most</b> portal area ± short fibrous septa                      |
| 3             | Fibrous expansion of some portal area with occasional portal to portal bridging         |
| 4             | Fibrous expansion of some portal area with marked bridging as well as portal to central |
| 5             | Marked bridging (portal to portal and/or portal to central) with occasional nodules     |
| 6             | Cirrhosis, probable or definite                                                         |

However, liver biopsy is not free of risk. Many complications have been reported; pain 84%, bleeding 1:2500-1:10000, death <1:10000. Other possible complications are pneumo/hemothorax, viscous organs perforation, bile peritonitis, bacteremia, sepsis, hemobilia, neuralgia and ventricular arrhythmia (6). Moreover, sampling error and intraobserver variations can lead to inaccurate interpretation (7). Thus, nowadays, many non-invasive devices have been invented to use instead of conventional liver biopsy.

#### Non-invasive tests to assess staging of liver fibrosis

- 1. Serum biomarkers:** based on biomarkers from fibrotic pathways eg. Fibrotest® (Biopredictive, Paris, France), AST to Platelet Ratio (APRI), Fibrospect® (Prometheus Laboratory Inc, San Diego, USA), Enhanced Liver Fibrosis score® (ELF) (Siemens Healthcare,

Erlangen, Germany). Several data have been approved these biomarkers for liver fibrosis assessment (8).

**2. Liver stiffness measurement (liver elastography):** based on elasticity of the liver

- a. Static or quasistatic (strain imaging) eg. eMode (Hitachi), eSie Touch (Siemens Healthcare), SonixTOUCH (Ultrasonix), Strain-based elastography (Philips Healthcare), Strain elastography (GE healthcare)
- b. Dynamic (Shear-wave imaging)
  - i. Transient (Ultrasound-based elastography)
    - 1. One-dimensional Transient elastography: Fibroscan (Echosens)
    - 2. Point shear wave elastography (pSWE) or acoustic radiation force impulse imaging (ARFI) ๓๕๓๓ Virtual touch tissue quantification™, (Siemens Healthcare), elastography point quantification (ElastPQ™, Philips), shear wave elastography (GE healthcare)
    - 3. Two-dimensional shear wave elastography (2D-SWE) eg. Aixplorer™ (Supersonic Imagine, France)
  - ii. Continuous eg. Magnetic resonance elastography (MRE) (GE healthcare, Philips Healthcare, Siemens Healthcare)

**2. Objectives**

Primary endpoint

To compare the performance of fibroscan, ultrasound elastography and magnetic resonance imaging elastography in chronic hepatitis patients

Secondary endpoint

- 1. To study the change of liver fibrosis within 1 years, measured by fibroscan, ultrasound elastography and magnetic resonance imaging elastography in Thai chronic hepatitis patients
- 2. To study the quality of life in Thai chronic hepatitis patients

**3. Hypothesis**

Primary research question

What are the differences among fibroscan, ultrasound elastography and magnetic resonance imaging elastography?

### Secondary research question

1. How is the change in liver fibrosis in chronic hepatitis C and NAFLD patients in 1-year period?
2. How is the quality of life in chronic hepatitis C and NAFLD patients?

### **4. Key words**

Chronic hepatitis C infection, non-alcoholic fatty liver disease, Elastography

### **5. Research design**

Prospective, analytic study

### **6. Research methodology**

#### Target population

Chronic hepatitis C and NAFLD patients

#### Inclusion criteria

1. Patients diagnosed with chronic hepatitis C (positive anti-HCV antibody more than 6 months)
2. Age > 18 years

#### Exclusion criteria

1. Alcohol drinking >14 units/week in male, or >7 units/week in female
2. HIV coinfection
3. Hepatitis B (HBV) coinfection
4. Decline to participate in the study
5. Other chronic hepatitis from other causes eg, autoimmune hepatitis, hemochromatosis, Wilson disease, cholestatic or vascular liver diseases
6. Decompensated cirrhosis
7. Contraindication for MRE; claustrophobia, metallic implant, pregnancy

#### Research protocol

1. Inform objectives, benefit and risk and get a formal informed consent from the participants
2. History taking, physical examination and data collection

3. Blood taking in clotted tube and EDTA tube (6 mL)
4. Leave specimen in room-temperature for 30 minutes
5. Centrifuge the specimen for 15 minutes
6. Serum collection at -70°C refrigerator
7. Perform liver fibrosis assessment by 3 methods; Fibroscan, ultrasound elastography and MRE

#### How to manage the residual biologic material

After the study ends, your residual biologic material; blood, will be collected at Division of gastroenterology, Chulalongkorn hospital, Rama IV road, Pathumwan, Bangkok 10330 for evaluate various of biologic markers in the future. We will collect your blood for 15 years and then the remaining specimen will be destroyed after that. If we would like to take any of your collected specimen, we will ask for a permission to Ethic Committee (EC) before using the biologic specimen.

#### Sample size calculation

$$\text{Number} = \frac{[Z_{\alpha/2} + Z_{\beta}]^2 \sigma^2}{(d)^2}$$

$$\alpha = 0.05 \quad \rightarrow \quad Z_{\alpha/2} = 1.96$$

$$\beta = 0.1 \quad \rightarrow \quad Z_{\beta} = 1.28$$

$$\sigma^2 = \text{variance of difference} = SD1^2 + SD2^2 - 2(r)SD1SD2$$

$$d = \text{mean of difference} = (X1 - X2)$$

From previous HCV data

X1 = the mean transient elastogram to detect advanced fibrosis from Fibroscan = 7.1

X2 = the mean transient elastogram to detect advanced fibrosis from MRE = 4.15

SD1 = SD of liver fibrosis measured by Fibroscan = 0.54

SD2 = SD of liver fibrosis measured by MRE = 8.2

r = Correlation between TE and MRE = 0

$$\sigma^2 = (0.54)^2 + (8.2)^2 - 2(0)(0.54)(8.2) = 67.5$$

$$\text{Calculated sample size} = \frac{[1.96 + 1.28]^2 67.5}{(7.1 - 4.15)^2} = 81.4$$

Estimated 20% drop-out rate. Therefore, number of chronic hepatitis patients needed = 98 patients

## **7. Data collection**

Data will be collected by investigators and research team, Division of gastroenterology, Chulalongkorn hospital

## **8. Data analysis and statistics**

Qualitative or categorical data will be presented as frequency, percentage as appropriate.

Quantitative data will be presented as mean, median and standard deviation (SD.)

Repeated ANOVA is used to analyse the difference among three devices. P-value < 0.05 defines as statistical significance.

MRE is recognized as a gold standard in this study instead of liver biopsy

## **9. Expected or anticipated benefit gain**

To add on the clinical information in liver fibrosis among Thai chronic hepatitis patients, which lead to appropriate management and care. The participants will also know the dynamic change in liver fibrosis within 1 year.

## **10. Challenges**

Specimen collection problem and blood taking

## **11. Risk and investigator's responsibility**

If the participants experience some possible complications during the trial, they will receive immediate treatment. Our investigator team will responsible for the cost of treatment.

If the participants experience any adverse events, they can contact the principle investigators by phone any time.

## **12. Timeline**

12 months

## **13. Venue of the study**

Hepatology clinic, Division of gastroenterology, Chulalongkorn university



#### 14. Tabulation of Research Activities and Timeline

| List                                  | 2016 |    |    |    |    |    |    | 2017 |    |    |    |
|---------------------------------------|------|----|----|----|----|----|----|------|----|----|----|
|                                       | 06   | 07 | 08 | 09 | 10 | 11 | 12 | 01   | 02 | 03 | 04 |
| IRB process                           | ■    | ■  | ■  | ■  | ■  | ■  |    |      |    |    |    |
| Specimen collection                   |      |    |    |    |    |    | ■  | ■    |    |    |    |
| Assessment serum AFP, AFP-L3, PIVKAll |      |    |    |    |    |    |    |      | ■  |    |    |
| Data collection                       |      |    |    |    |    |    |    |      | ■  | ■  |    |
| Analysis                              |      |    |    |    |    |    |    |      | ■  | ■  |    |
| Summary                               |      |    |    |    |    |    |    |      | ■  | ■  |    |
| Manuscript and send for publications  |      |    |    |    |    |    |    |      |    |    | ■  |

#### 15. Budget

| List                             | Description           | Total (Baht)   |
|----------------------------------|-----------------------|----------------|
| 1. Wage                          |                       |                |
| 1.1 Scientists                   | 15,000 baht x 2       | 30,000         |
|                                  | <b>Total</b>          | <b>30,000</b>  |
| 2. Expense                       |                       |                |
| 2.1 Data and specimen collection | 300 baht x 196 cases  | 58,800         |
|                                  | <b>Total</b>          | <b>58,800</b>  |
| 3. Research officer              |                       |                |
| 3.1 Research assistant           | 2000 baht x 12 months | 24,000         |
|                                  | <b>Total</b>          | <b>24,000</b>  |
| 4. Others                        |                       |                |
| 4.1 Office                       |                       | 5,000          |
| 4.2 Computer                     |                       | 10,000         |
| 4.3. Scientific methods          |                       |                |
| 1. buffy coat and serum          | 196 cases x 200 baht  | 39,200         |
| 2. DNA extraction                | 196 cases x 200 baht  | 39,200         |
| 3. SNPs analysis                 | 196 cases x 400 baht  | 78,400         |
|                                  | <b>Total</b>          | <b>156,800</b> |
| <b>TOTAL</b>                     |                       | <b>268,800</b> |

## 16. References

1. Mohd Hanafiah K, Groeger J, Flaxman AD, Wiersma ST. Global epidemiology of hepatitis C virus infection: new estimates of age-specific antibody to HCV seroprevalence. *Hepatology* 2013;57:1333-1342.
2. Williams CD, Stengel J, Asike MI, Torres DM, Shaw J, Contreras M, Landt CL, et al. Prevalence of nonalcoholic fatty liver disease and nonalcoholic steatohepatitis among a largely middle-aged population utilizing ultrasound and liver biopsy: a prospective study. *Gastroenterology* 2011;140:124-131.
3. Lee YA, Wallace MC, Friedman SL. Pathobiology of liver fibrosis: a translational success story. *Gut* 2015;64:830-841.
4. Urban ML, Manenti L, Vaglio A. Fibrosis--A Common Pathway to Organ Injury and Failure. *N Engl J Med* 2015;373:95-96.
5. Bedossa P, Poynard T. An algorithm for the grading of activity in chronic hepatitis C. The METAVIR Cooperative Study Group. *Hepatology* 1996;24:289-293.
6. Rockey DC, Caldwell SH, Goodman ZD, Nelson RC, Smith AD. Liver biopsy. *Hepatology* 2009;49:1017-1044.
7. Rousselet MC, Michalak S, Dupre F, Croue A, Bedossa P, Saint-Andre JP, Cales P. Sources of variability in histological scoring of chronic viral hepatitis. *Hepatology* 2005;41:257-264.
8. Fontana RJ, Goodman ZD, Dienstag JL, Bonkovsky HL, Naishadham D, Sterling RK, Su GL, et al. Relationship of serum fibrosis markers with liver fibrosis stage and collagen content in patients with advanced chronic hepatitis C. *Hepatology* 2008;47:789-798.
9. Kim SU, Choi GH, Han WK, Kim BK, Park JY, Kim DY, Choi JS, et al. What are 'true normal' liver stiffness values using FibroScan?: a prospective study in healthy living liver and kidney donors in South Korea. *Liver Int* 2010;30:268-274.
10. Castera L, Vergniol J, Foucher J, Le Bail B, Chanteloup E, Haaser M, Darriet M, et al. Prospective comparison of transient elastography, Fibrotest, APRI, and liver biopsy for the assessment of fibrosis in chronic hepatitis C. *Gastroenterology* 2005;128:343-350.
11. Zarski JP, Sturm N, Guechot J, Paris A, Zafrani ES, Asselah T, Boisson RC, et al. Comparison of nine blood tests and transient elastography for liver fibrosis in chronic hepatitis C: the ANRS HCEP-23 study. *J Hepatol* 2012;56:55-62.
12. Wong VW, Vergniol J, Wong GL, Foucher J, Chan HL, Le Bail B, Choi PC, et al. Diagnosis of fibrosis and cirrhosis using liver stiffness measurement in nonalcoholic fatty liver disease. *Hepatology* 2010;51:454-462.

13. Sporea I, Bota S, Peck-Radosavljevic M, Sirli R, Tanaka H, Iijima H, Badea R, et al. Acoustic Radiation Force Impulse elastography for fibrosis evaluation in patients with chronic hepatitis C: an international multicenter study. *Eur J Radiol* 2012;81:4112-4118.
14. Liu H, Fu J, Hong R, Liu L, Li F. Acoustic Radiation Force Impulse Elastography for the Non-Invasive Evaluation of Hepatic Fibrosis in Non-Alcoholic Fatty Liver Disease Patients: A Systematic Review & Meta-Analysis. *PLoS One* 2015;10:e0127782.
15. Fierbinteanu Braticевич C, Sporea I, Panaitescu E, Tribus L. Value of acoustic radiation force impulse imaging elastography for non-invasive evaluation of patients with nonalcoholic fatty liver disease. *Ultrasound Med Biol* 2013;39:1942-1950.
16. Shi Y, Xia F, Li QJ, Li JH, Yu B, Li Y, An H, et al. Magnetic Resonance Elastography for the Evaluation of Liver Fibrosis in Chronic Hepatitis B and C by Using Both Gradient-Recalled Echo and Spin-Echo Echo Planar Imaging: A Prospective Study. *Am J Gastroenterol* 2016.
17. Wu WP, Chou CT, Chen RC, Lee CW, Lee KW, Wu HK. Non-Invasive Evaluation of Hepatic Fibrosis: The Diagnostic Performance of Magnetic Resonance Elastography in Patients with Viral Hepatitis B or C. *PLoS One* 2015;10:e0140068.
18. Kishore R, Loomba R, Sterling RK. Editorial: A New Spin on Magnetic Resonance Elastography. *Am J Gastroenterol* 2016;111:834-837.
19. Shiha G, Ibrahim A, Helmy A, Sarin SK, Omata M, Kumar A, Bernstein D, et al. Asian-Pacific Association for the Study of the Liver (APASL) consensus guidelines on invasive and non-invasive assessment of hepatic fibrosis: a 2016 update. *Hepatology* 2016.
20. Loomba R, Cui J, Wolfson T, Haufe W, Hooker J, Szeverenyi N, Ang B, et al. Novel 3D Magnetic Resonance Elastography for the Noninvasive Diagnosis of Advanced Fibrosis in NAFLD: A Prospective Study. *Am J Gastroenterol* 2016;111:986-994.

# Case record form

Center of excellence in liver diseases,  
King Chulalongkorn Memorial Hospital,  
Thai Red Cross, Bangkok, Thailand

Patient code:

Date of data record: ( Day-Month-Year)

--

## Part 1: Basic information

1. Sex  1. Male  2. Female      2. Birth date \_\_\_\_ / \_\_\_\_ / \_\_\_\_
3. Tel : \_\_\_\_\_ - \_\_\_\_\_      Mobile: \_\_\_\_\_ - \_\_\_\_\_
4. Address \_\_\_\_\_
5. Hometown \_\_\_\_\_
6. Body weight \_\_\_\_\_ kg.
7. Height \_\_\_\_\_ cm.
8. Waist circumference \_\_\_\_\_ cm.
9. Underlying diseases
1. N/A       2. None
3. Yes
- 3.1. CVS       3.2. CKD       3.3. Dyslipidemia
- 3.4. DM       3.5. HT       3.6. อื่นๆ (ระบุ) \_\_\_\_\_
10. Alcohol       1. Yes       2. Quit > 6 months       3. No       9. N/A
11. Blood transfusion       1. Yes, \_\_\_\_\_       2. No       9. N/A
12. Tattoo       1. Yes, \_\_\_\_\_       2. No       9. N/A
13. IVDU       1. Yes, \_\_\_\_\_       2. No       9. N/A
14. Family history of hepatitis/HCC       1. Yes, \_\_\_\_\_       2. No       9. N/A

## Part 2: Diagnosis

15. Etiology Dx date: \_\_\_\_\_
1. HCV genotype       1. G1       2. G2       3. G3       4. G6       5. อื่นๆ ระบุ \_\_\_\_\_       9. ไม่มีข้อมูล
- Previous Rx       1. None       2. Yes \_\_\_\_\_
2. NAFLD
- Previous Rx       1. None       2. Yes \_\_\_\_\_
16. Stage of disease       1. Chronic hepatitis       2. Cirrhosis       3. Not assess
17. Fibroscan      Date \_\_\_\_\_       1. CAP \_\_\_\_\_ dB/m       2. TE \_\_\_\_\_ Kpa
18. HCC       1. Yes       2. No

## Part 3: Specimen collection

Date of collected specimen  -  -

19. CBC: Hb \_\_\_\_\_ Hct \_\_\_\_\_ WBC \_\_\_\_\_ (%neu \_\_\_\_\_) Plt \_\_\_\_\_ INR \_\_\_\_\_ PT \_\_\_\_\_

20. Liver function tests: TB \_\_\_\_\_ DB \_\_\_\_\_ AST \_\_\_\_\_ ALT \_\_\_\_\_ ALP \_\_\_\_\_ Alb \_\_\_\_\_  
Glb \_\_\_\_\_

21. BUN \_\_\_\_\_ Cr \_\_\_\_\_

22. FBS \_\_\_\_\_ HbA1C \_\_\_\_\_ mg%  
TG \_\_\_\_\_ LDL \_\_\_\_\_ CHol \_\_\_\_\_ HDL \_\_\_\_\_

23. Viral hepatitis

1. Anti-HCV  1. Positive  2. Negative  9. N/A

2. HCV-viral load  1. Yes    ,     ,    (IU/ml)  
 2. No  9. N/A

3. HCV Genotype  1. Yes  2. No  9. N/A

3.1  1. G1  2. G2  3. G3  4. G6  5. Other: \_\_\_\_\_  9. N/A

4. HBsAg  1. Positive  2. Negative  9. N/A

5. Anti-HIV  1. Positive  2. Negative  9. N/A

Part 4: Fibrosis assessment

24. Fibroscan Date \_\_\_\_\_ Probe  1. M  2. XL Success rate \_\_\_\_\_ % IQR \_\_\_\_\_ %

1. CAP \_\_\_\_\_ dB/m  2. TE \_\_\_\_\_ Kpa

25. USG Date \_\_\_\_\_  1. TE \_\_\_\_\_ Kpa Success  1. Yes  2. No

26. MRE Date \_\_\_\_\_  1. TE \_\_\_\_\_ Kpa Success  1. Yes  2. No

Part 5: One-year follow up

Date of collected specimen   -   -

27. CBC: Hb \_\_\_\_\_ Hct \_\_\_\_\_ WBC \_\_\_\_\_ (%neu \_\_\_\_\_) Plt \_\_\_\_\_ INR \_\_\_\_\_ PT \_\_\_\_\_

28. Liver function tests: TB \_\_\_\_\_ DB \_\_\_\_\_ AST \_\_\_\_\_ ALT \_\_\_\_\_ ALP \_\_\_\_\_ Alb \_\_\_\_\_  
Glb \_\_\_\_\_

29. BUN \_\_\_\_\_ Cr \_\_\_\_\_

30. FBS \_\_\_\_\_ HbA1C \_\_\_\_\_ mg%  
TG \_\_\_\_\_ LDL \_\_\_\_\_ CHol \_\_\_\_\_ HDL \_\_\_\_\_

31. Fibroscan Date \_\_\_\_\_ Probe  1. M  2. XL Success rate \_\_\_\_\_ % IQR \_\_\_\_\_ %

1. CAP \_\_\_\_\_ dB/m  2. TE \_\_\_\_\_ Kpa

32. USG Date \_\_\_\_\_  1. TE \_\_\_\_\_ Kpa Success  1. Yes  2. No

33. MRE Date \_\_\_\_\_  1. TE \_\_\_\_\_ Kpa Success  1. Yes  2. No

34. HCV Treatment  1. No treatment  
 2. Treatment regimen \_\_\_\_\_ duration \_\_\_\_\_  
 1. Cured  2. Not cured

## Information for participants

**Title of research:** Comparison of transient elastography, acoustic radiation force impulse and magnetic resonance imaging for non-invasive staging of liver fibrosis in patients with chronic hepatitis C and nonalcoholic fatty liver disease: 1-year follow-up of fibrosis progression

**Principle investigators:**

1. Dr. Piyawat Komolmit

**Affiliation:**

Division of Gastroenterology and Hepatology Department of Medicine, Faculty of  
Medicine Chulalongkorn University  
Tel. 02-2564265, 090-6764824

**To participants**

You are invited to participate in this clinical trial as you have chronic hepatitis.

Before your agreement to involve in this trial, please read this document thoroughly for your understanding of the reason of the research and the detail of the protocol. If you have any questions, please ask our investigator team or principle investigators.

You can ask for advice from your family, friend or your general practitioner. You have time for your decision freely. If you decide to participate in this trial, please sign the agreement at the end of this document.

**Background**

Chronic hepatitis C and non-alcoholic liver disease (NAFLD) are the leading causes of chronic hepatitis worldwide. The persistent inflammation of liver parenchyma results in progressive fibrosis, which ultimately turns to liver cirrhosis. Liver biopsy is the gold standard method for fibrosis evaluation. However, it is not free of risk. Bleeding complication was reported with incidence of 1:2,500 to 1:10,000 and fatal complication was also reported about 0.09%. Nowadays, there are new devices and technology for evaluating liver fibrosis instead of invasive liver biopsy, which help us to detect an early stage of liver fibrosis.

Ultrasound elastography and magnetic resonance imaging were developed in recent years. Unfortunately, there was no data in Thai chronic hepatitis patients. Therefore, we conducted this

study to evaluate the performance of ultrasound elastography and magnetic resonance imaging in Thai patients.

### **Objective of the study**

#### **Primary objective**

To compare the performance of fibroscan, ultrasound elastography and magnetic resonance imaging elastography in chronic hepatitis patients

#### **Secondary outcome**

3. To study the change of liver fibrosis within 1 years, measured by fibroscan, ultrasound elastography and magnetic resonance imaging elastography in Thai chronic hepatitis patients
4. To study the quality of life in Thai chronic hepatitis patients

**Number of participants:** 80 persons

### **Methods involve in this trial**

After your agreement to participate in this trial, our investor team would like to the following tests.

1. History taking, physical examination, and evaluating quality of life by SF-36, which already validated in Thai population.
2. Liver fibrosis evaluation two times within 1 year by 3 special devices
  - a. Fibroscan (Echosens, Paris, France)
  - b. Ultrasound elastography (ARFI-acoustic radiation force impulse imaging) by LOGIQ E9 Xdclear, GE, Wisconsin, USA)
  - c. MRE-Magnetic resonance elastography
3. Participant should fast for 2-hour duration before fibrosis evaluation.
4. Our investigator will take your blood (6 ml) to evaluate liver function, complete blood count and other related laboratory data.
5. Within 1 year, our investigator will make an appointment for re-evaluate liver fibrosis with three special devices and blood test.

### **Responsibility of the participants**

For success of this study, we would like to ask participants to have discipline to comply with the protocol. If you have any abnormal symptoms during this study, please contact the investigator team.

### **Risk of the study**

This study may possibly interfere personal daily life. You may lose your time and feel physically and mentally uncomfortable during the study protocol.

### **Risk of the special devices**

The special device, including Fibroscan, Ultrasound elastography and MRE-Magnetic resonance elastography, may cause some uncomfortable feeling during the test protocol. Some participants may experience the claustrophobic sensation and pain at right costal area during the test.

### **Risk from drawing blood sample**

You may experience of pain at the puncture site, minor bleeding, ecchymosis, edema, syncope and local infection, which rarely happen.

### **Risk from other things**

You might experience of some other symptoms not mention in this document as not seen before. For your safety, please report of any symptoms you may concern to the investigator team at any time.

If there is any new reports of any safety concern regarding the medications used in this trial, we will inform all participants as soon as possible and you may decide to continue or pull out from the study.

### **How to see the doctor for your concern of any adverse events**

You can contact the principle investigators or the team at any time in case you experience of some symptoms or concern of any adverse events. Immediate advice or treatment will be provided.

### **Benefit from the study**

To participate in this trial, you might know the dynamic changes of fibrosis in your liver, which could lead to an appropriate treatment and follow-up. However, this will not be a guarantee.

### **Other methods or managements for the participants**



You have no need to be in this clinical trial for expecting of the treatment. As there might be other ways of treatment for your disease. You may ask the doctor or your GP before making decision to participate in this clinical trial.

### **Practical points for participants during the trial**

Please read carefully

- Please give your information regarding your health and history of diseases or treatment.
- Please inform our team if you experience any symptoms of concern.

### **Adverse events or complications happened during the trial and responsibility**

If you have any complications during the trial, you will receive immediate treatment. Our investigator team will responsible for the cost of treatment and you signature at the end of the document does not mean that you disclaim from your regular health scheme.

If you experience any adverse events, you could contact the principle investigators by phone any time.

### **Our expenses for participation in this trial**

You do not have to pay for special tests, doctor fee or cost of laboratory tests.

### **Participation or withdrawn from clinical trial**

To participate in this clinical trial is you right to make decision and you could withdraw from the trial at any time. Your decision will not have any risk or consequence to your regular treatment of your diseases.

Our investigator team will withdraw you from the trial for your safety or for other following reasons:

- You could not comply with our protocol.
- You have pregnancy during the trial.

### **Measurement for protection of participants' data**

Your data and your name will be protected from any publicity. In case of publication, the name or address of the participant will be protected and the participant code number will be used instead.

After your agreement, the investigators will have the right to exam your data even after the trial finished. If you could withdraw that right at any time by contacting and inform in person or in writing and send it to the principle investigator (address shown).

If you withdraw from the trial, your add on personal data will not be done. However, some data will be used for evaluation. You could not return to the study protocol again after withdrawal. After your agreement, the investigator could inform your GP regarding the agreement for participation in the trial.

### **How to manage the residual biologic material**

After the study ends, your residual biologic material; blood, will be collected at Division of gastroenterology, Chulalongkorn hospital, Rama IV road, Pathumwan, Bangkok 10330 for evaluate various of biologic markers in the future. We will collect your blood for 15 years and then the remaining specimen will be destroyed after that. If we would like to take any of your collected specimen, we will ask for a permission to Ethic Committee (EC) before using the biologic specimen.

### **Right of the participants**

As you decide to be in this trial, you have the right as following

- You will receive information of the trial
- The investigators will inform regarding method of the study, drugs and other tests.
  - o You will receive information of risk or adverse event from the medications
  - o You will receive information of the benefit of the trial
- You will receive information regarding other alternative treatment that might benefit to your disease.
- You will receive information of management of adverse events or complications.
- You could ask for more information regarding process of the study.
- You will receive information regarding how and when to withdraw from the study which could be any time.
- You will receive the consent form with the signatures and date
- You have the right to make decision whether or not to participate the trial without any influence or pressure from anyone.

If you do receive any compensation for your adverse events related to trial medication or you do not receive proper management as the explanation in this document, you could contact the principle investigators directly or report to Institutional Review Board, Faculty of Medicine,

Chulalongkorn University at the office on the 3rd floor Mahidol Building, King Chulalongkorn Memorial Hospital, Rama 4 Road, Pathumwan, Bangkok 10330, Tel. 02-256- 4455, ext. 14 or 15 during office hour.

Thank you for your cooperation

## Consent form for agreement to participate in the trial

**Title of research:** Comparison of transient elastography, acoustic radiation force impulse and magnetic resonance imaging for non-invasive staging of liver fibrosis in patients with chronic hepatitis C and nonalcoholic fatty liver disease: 1-year follow-up of fibrosis progression

Date of agreement: Date..... Month.....Year.....

I, Mr./Mrs./MS..... Age.....years

Current address.....

.....Tel. ....

have read the information for the participant and agree to participate in this clinical trial.

I have received the copy of the consent form for participation in the trial and sign with the name and date include receiving the detail document for participant. I have received explanation regarding objective, period of study, methodology, risks that might happen and benefit of this trial. I have enough time to read and ask for any concern regarding the clinical trial and the investigators give all information without any hidden agenda.

I have the right to withdraw from the clinical trial at any time and without the need to explain the reasons. In addition, the withdrawal will not have any consequence to my disease management or my right to receive proper management.

The investigators confirm to protect the secrecy of my data and will reveal only on my permission.

Any investigation or examination of the data by other party including Institutional Review Board member have the right only to examine for the accuracy of the data. By this agreement, I accept for the examination of my previous health history.

The investigator agrees to the participant that, in case of withdrawal, no more additional data will be kept and the data related to the participant will be abolished and could not be traced back to the participant.

I understand that I have a right to exam or correct my personal data and have a right of others to use my personal data by informing the investigators.

I understand that the research data including the health history will not be opened or report by participant name. And the data will be used to process by data correction, computer analysis of the data and then report only for scientific and clinical purpose.

I accept to sign this consent form for participation in the clinical trial with approval.

..... Participant signature

..... Block letters

Date.....Month.....year.....

I have explained the information regarding this clinical trial including objective, methodology, risk or benefit of the trial and the participant as the above name has signed for the agreement to comply with the trial.

..... Investigator signature

..... Block letters

Date.....Month.....year.....

..... Witness signature

..... Block letters

Date.....Month.....year.....
